# Supplementary material
Source: PubMed Central journal article supplement (PMC10524693)
Supplement: NIHMS1905384-supplement-1.pdf [file NIHMS1905384-supplement-1.pdf]

# Supplementary Figure 1

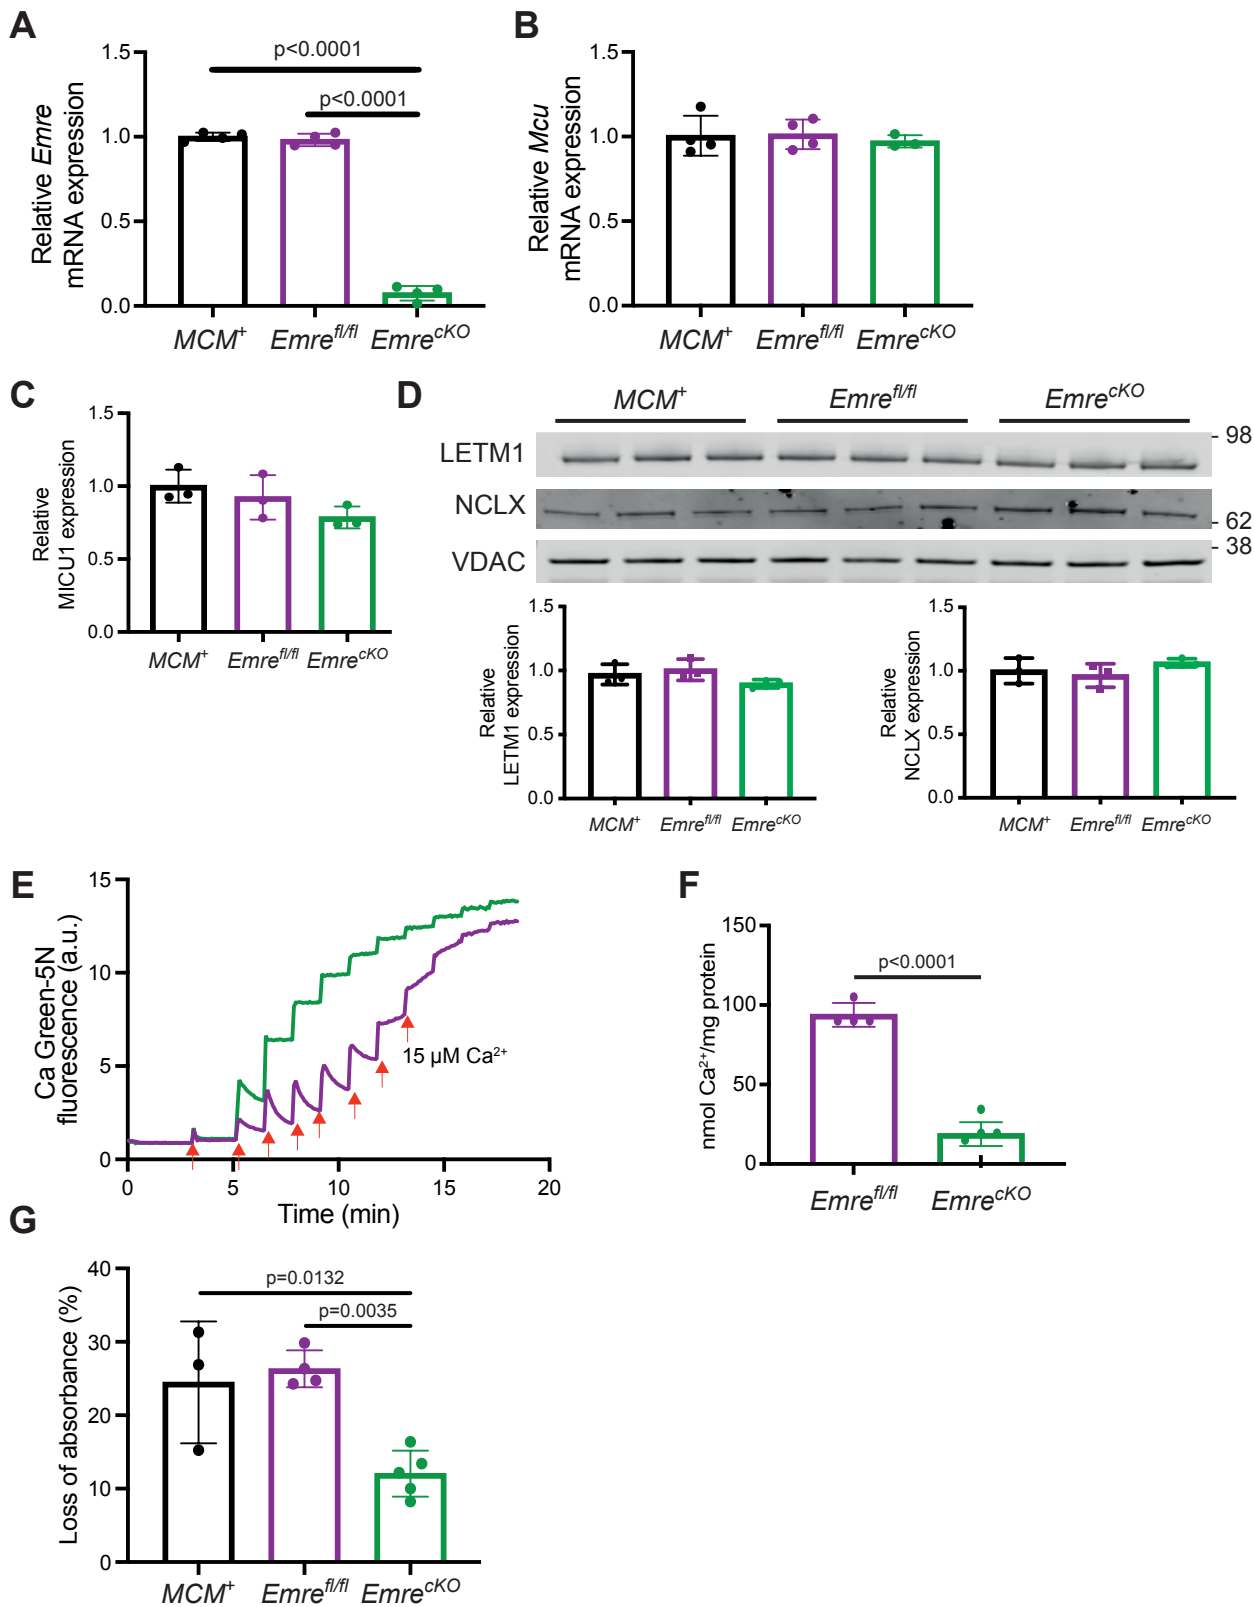

**Supplementary Figure 1.** Short-term *Emre* deletion affects mitochondrial  $\text{Ca}^{2+}$  uptake but not the expression of mitochondrial  $\text{Ca}^{2+}$  efflux proteins. Analyses were performed 3 weeks post-tamoxifen. **A)** Relative *Emre* mRNA expression in heart tissue from *MCM*<sup>+</sup>:  $1.00 \pm 0.02$ , *Emre*<sup>*fl/fl*</sup>:  $0.98 \pm 0.03$  and *Emre*<sup>*CKO*</sup>:  $0.07 \pm 0.04$ . Values represent mean  $\pm$  SD. \*\**p*<0.0001, *n* = 4 per group. One-way ANOVA test was used for statistical analysis. **B)** Relative *Mcu* mRNA expression in heart tissue from *MCM*<sup>+</sup>:  $1.00 \pm 0.11$ , *Emre*<sup>*fl/fl*</sup>:  $1.01 \pm 0.08$  and *Emre*<sup>*CKO*</sup>:  $0.97 \pm 0.03$ . Values represent mean  $\pm$  SD. *n* = 4 per group. **C)** Quantification of MICU1 protein levels from Western blot (Fig. 1A), where bars represent mean  $\pm$  SD. *p*-values were not significant. *n* = 3 per group. One-way ANOVA test was used for statistical analysis. **D)** Western blot of LETM1, NCLX, and VDAC in cardiac mitochondria from *MCM*<sup>+</sup>, *Emre*<sup>*fl/fl*</sup>, and *Emre*<sup>*CKO*</sup> mice at 3 weeks post-tamoxifen. Quantification is shown below, where bars represent mean  $\pm$  SD. *p*-values were not significant. *n* = 3 per group. One-way ANOVA test was used for statistical analysis. **E)** Representative  $\text{Ca}^{2+}$  retention capacity (CRC) assay in isolated heart mitochondria from *Emre*<sup>*fl/fl*</sup> (purple line) and *Emre*<sup>*CKO*</sup> (green line) mice. Mitochondria were energized with 10 mM glutamate/5 mM malate. The fluorescent  $\text{Ca}^{2+}$  indicator Calcium Green-5N was used to monitor extramitochondrial  $\text{Ca}^{2+}$ . The arrows represent 15  $\mu\text{M}$   $\text{Ca}^{2+}$  additions. Traces are representative of *n* = 4 independent experiments. **F)**  $\text{Ca}^{2+}$  retention capacity calculated from independent traces as shown in (E). The estimated mean  $\text{Ca}^{2+}$ /mg protein was for *Emre*<sup>*fl/fl*</sup>:  $93.8 \pm 7.5$  and *Emre*<sup>*CKO*</sup>:  $18.8 \pm 7.5$  nmol. Values represent mean  $\pm$  SD. \*\**p*<0.0001, *n* = 4 in each group. Student's *t*-test was used for statistical analysis. **G)** Quantitative analysis of swelling calculated via loss of absorbance (%) 15 minutes after  $\text{Ca}^{2+}$  addition. *MCM*<sup>+</sup>:  $24.48\% \pm 8.29$ , *Emre*<sup>*fl/fl*</sup>:  $26.32\% \pm 2.52$  and *Emre*<sup>*CKO*</sup>:  $12.04\% \pm 3.12$ . Values represent mean  $\pm$  SD. \*\**p*<0.0001, *n* = 4-5 in each group. One-way ANOVA test was used for statistical analysis.

# Supplementary Figure 2

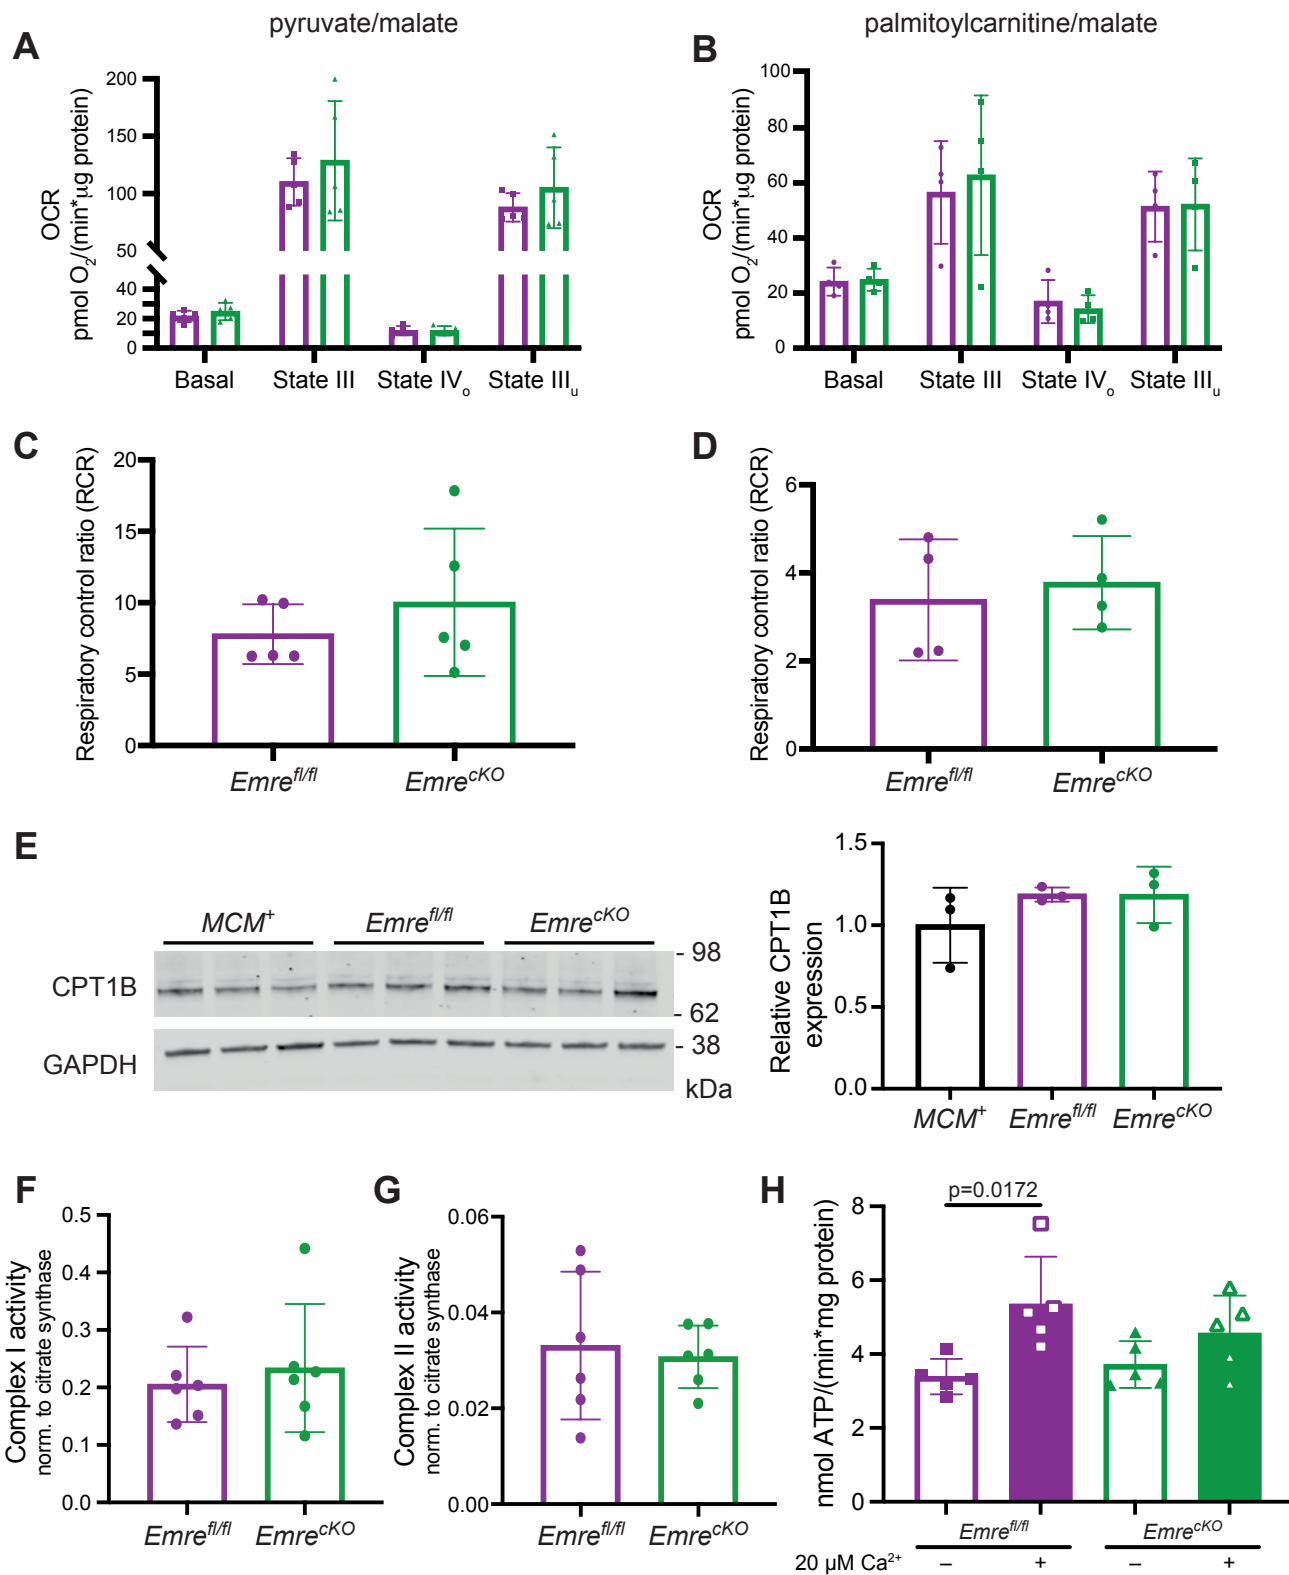

**Supplementary Figure 2.** *Effects of short-term Emre deletion on bioenergetic capacity.* Analyses were performed 3 weeks post-tamoxifen. **A-B)** Seahorse analysis of oxygen consumption rate (OCR) in cardiac mitochondria was measured following sequential injections: 4 mM ADP (state III), 2.5  $\mu$ g/mL oligomycin (state IV<sub>o</sub>), 6  $\mu$ M FCCP (state III<sub>u</sub>) and 4  $\mu$ M rotenone/4  $\mu$ M antimycin A. Mitochondria were supplied with 5 mM pyruvate/0.5 mM malate (A) or 40  $\mu$ M palmitoylcarnitine/0.5 mM malate (B). **C)** Respiratory control ratio (RCR; OCR in state III<sub>u</sub>/state IV<sub>o</sub>) in mitochondria supplied with 5 mM pyruvate/0.5 mM malate: *Emre*<sup>fl/fl</sup>:  $7.8 \pm 2.08$  and *Emre*<sup>cKO</sup>:  $10.02 \pm 5.16$ . Values represent mean  $\pm$  SD, n = 5 per group (combined males and females). Student's t-test was used for statistical analysis. **D)** RCR in mitochondria supplied with 40  $\mu$ M palmitoylcarnitine/0.5 mM malate, *Emre*<sup>fl/fl</sup>:  $3.38 \pm 1.37$  and *Emre*<sup>cKO</sup>:  $3.77 \pm 1.06$ . Values represent mean  $\pm$  SD, n = 4 per group (combined males and females). Student's t-test was used for statistical analysis. **E)** Western blot for CPT1B in cardiac tissue: *MCM*<sup>+</sup>:  $1.00 \pm 0.22$ , *Emre*<sup>fl/fl</sup>:  $1.18 \pm 0.04$  and *Emre*<sup>cKO</sup>:  $1.18 \pm 0.17$ , n = 3 in each group. **F-G)** Complex I (NADH ubiquinone oxidoreductase) activity (F) and Complex II (succinate dehydrogenase) activity (G) normalized to citrate synthase (CS) activity. Values represent mean  $\pm$  SD, n = 6 per group, Student's t-test was used for statistical analysis. **H)** ATP production rate in isolated heart mitochondria stimulated with 50  $\mu$ M ADP and 10 mM glutamate/5 mM malate  $\pm$  20  $\mu$ M Ca<sup>2+</sup>, *Emre*<sup>fl/fl</sup>:  $3.39 \pm 0.47$  vs *Emre*<sup>fl/fl</sup> + 20  $\mu$ M Ca<sup>2+</sup>:  $5.35 \pm 1.28$ , and *Emre*<sup>cKO</sup>:  $3.71 \pm 0.63$  vs *Emre*<sup>cKO</sup> + 20  $\mu$ M Ca<sup>2+</sup>:  $4.56 \pm 1.01$  nmol ATP/(min\*mg) protein. Values represent mean  $\pm$  SD. \*p<0.05, n = 5 per group (combined males and females). One-way ANOVA was used for statistical analysis.

# Supplementary Figure 3

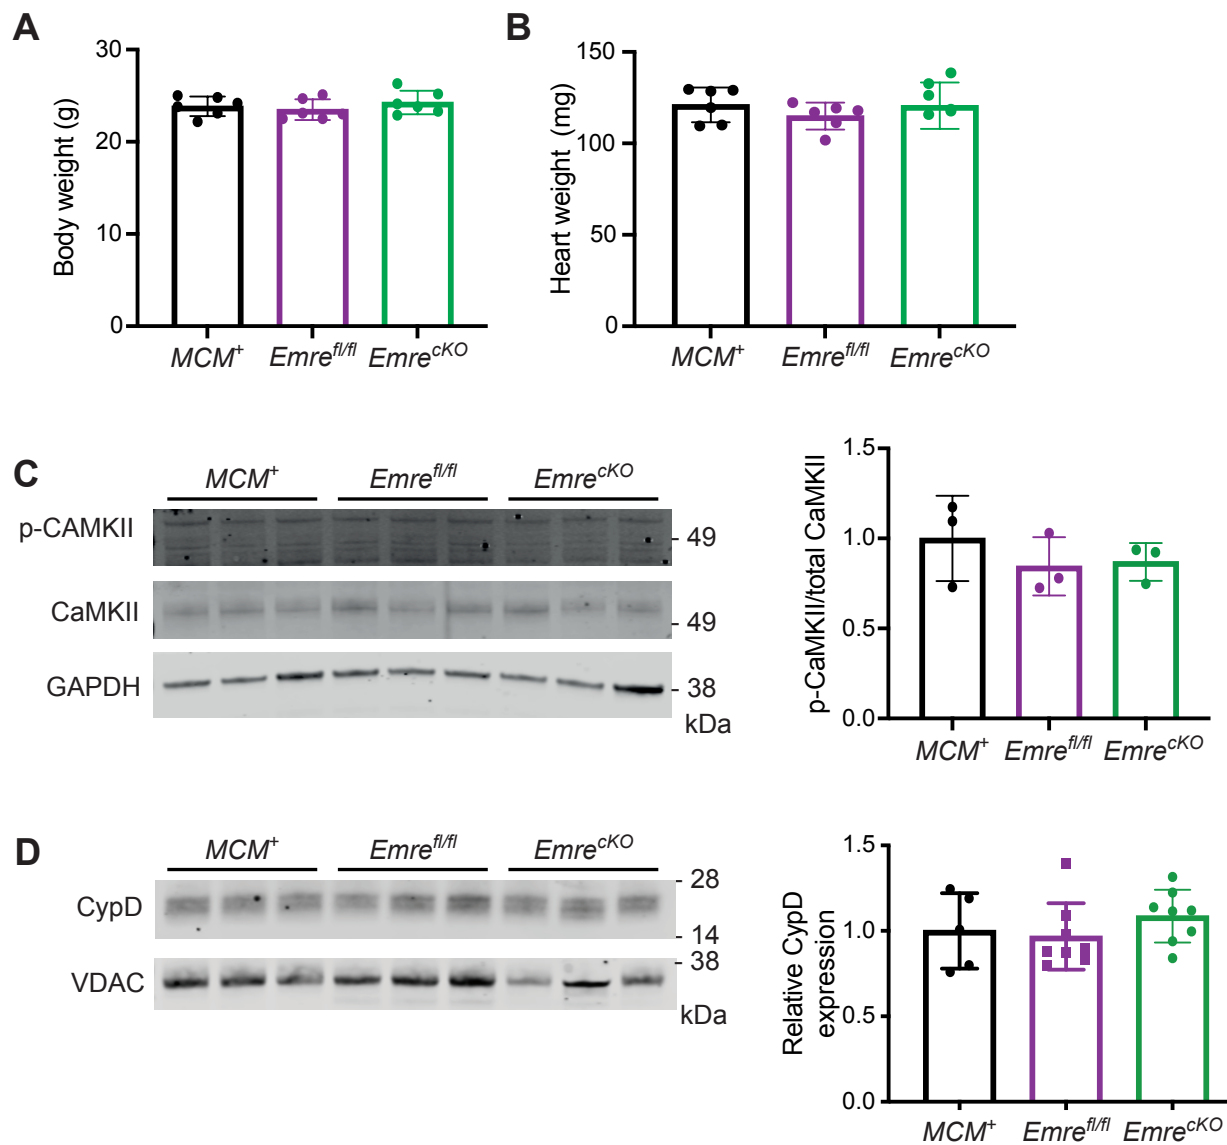

**Supplementary Figure 3.** *Effects of short-term Emre deletion on body and heart weight and protein expression.* Analyses were performed 3 weeks post-tamoxifen. **A-B)** Body weight (A) and heart weight (B) from  $MCM^+$ ,  $Emre^{fl/fl}$ , and  $Emre^{cKO}$  mice at 3 weeks post-tamoxifen. Values represent mean  $\pm$  SD, n = 6 per group. **C)** Western blot for phosphorylated CaMKII level relative to total CaMKII $\delta$  from cardiac tissue, quantified to the right in  $MCM^+$ :  $1.00 \pm 0.23$ ,  $Emre^{fl/fl}$ :  $0.84 \pm 0.16$  and  $Emre^{cKO}$ :  $0.87 \pm 0.10$ . Values represent mean  $\pm$  SD, n = 3 in each group. **D)** Western blot for Cyclophilin D (CypD) expression from cardiac mitochondria, quantified to the right in  $MCM^+$ :  $1.00 \pm 0.22$ ,  $Emre^{fl/fl}$ :  $0.96 \pm 0.19$  and  $Emre^{cKO}$ :  $1.08 \pm 0.15$ . Values represent mean  $\pm$  SD, n = 5/8/8 in each group. One-way ANOVA was used for statistical analysis in (A)-(D); p-values were not significant.

# Supplementary Figure 4

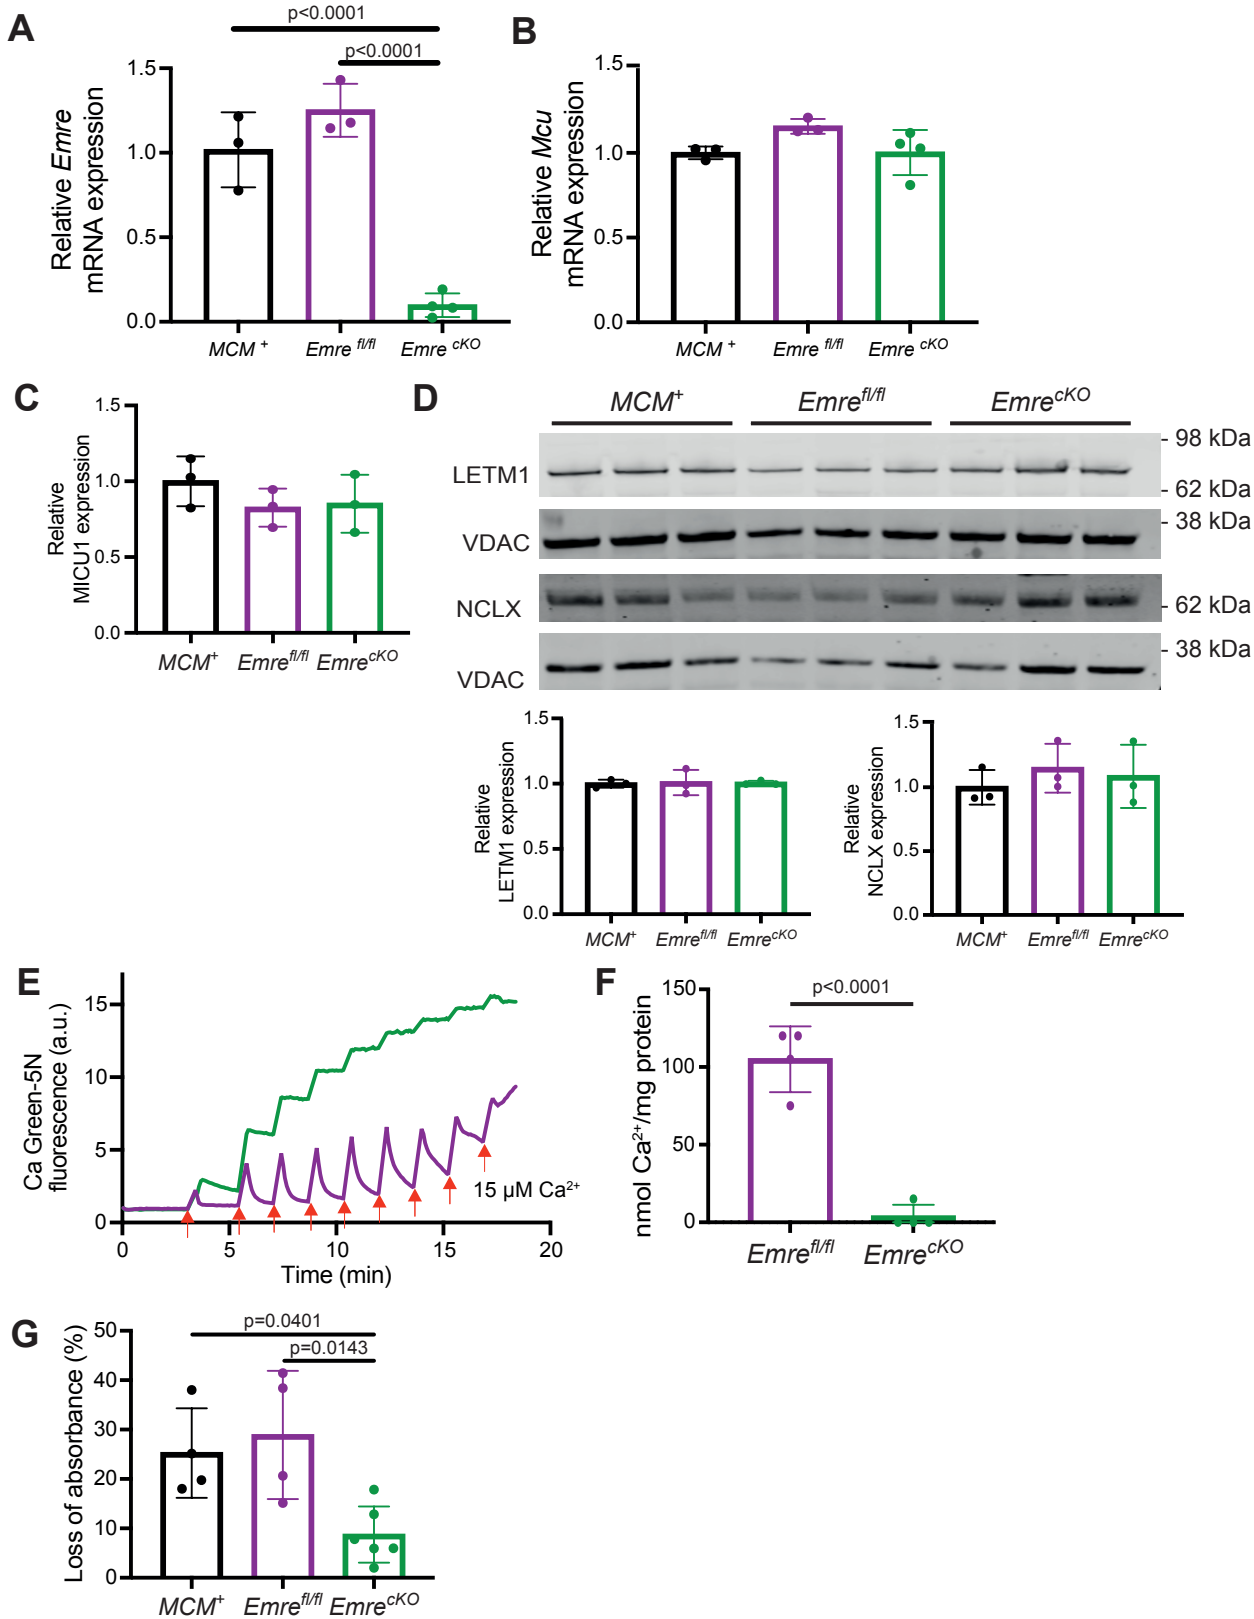

**Supplementary Figure 4.** Long-term *Emre* deletion affects mitochondrial  $\text{Ca}^{2+}$  uptake but not the expression of mitochondrial  $\text{Ca}^{2+}$  efflux proteins. Analyses were performed 3 months post-tamoxifen. **A)** Relative *Emre* mRNA expression in heart tissue from *MCM*<sup>+</sup>:  $1.00 \pm 0.22$ , *Emre*<sup>*fl/fl*</sup>:  $1.25 \pm 0.15$  and *Emre*<sup>*CKO*</sup>:  $0.09 \pm 0.06$ . Values represent mean  $\pm$  SD. \*\**p*<0.0001, *n* = 3-4 per group. One-way ANOVA test was used for statistical analysis. **B)** Relative *Mcu* mRNA expression levels in heart tissue from *MCM*<sup>+</sup>:  $1.00 \pm 0.03$ , *Emre*<sup>*fl/fl*</sup>:  $1.15 \pm 0.04$  and *Emre*<sup>*CKO*</sup>:  $1.00 \pm 0.13$ . Values represent mean  $\pm$  SD. *n* = 3-4 per group. **C)** Quantification of MICU1 expression from Western blot (Fig. 5A), where bars represent mean  $\pm$  SD. *p*-values were not significant. *n* = 3 per group. One-way ANOVA test was used for statistical analysis. **D)** Western blot of LETM and NCLX in cardiac mitochondria. Quantification is shown below, where bars represent mean  $\pm$  SD. *p*-values were not significant. *n* = 3 per group. One-way ANOVA test was used for statistical analysis. **E)** Representative  $\text{Ca}^{2+}$  retention capacity (CRC) assay in isolated heart mitochondria from *Emre*<sup>*fl/fl*</sup> (purple line) and *Emre*<sup>*CKO*</sup> (green line) mice. Mitochondria were energized with 10 mM glutamate/5 mM malate. The fluorescent  $\text{Ca}^{2+}$  indicator Calcium Green-5N was used to monitor extramitochondrial  $\text{Ca}^{2+}$ . The arrows represent 15  $\mu\text{M}$   $\text{Ca}^{2+}$  additions. Traces are representative of *n* = 4 independent experiments. **F)**  $\text{Ca}^{2+}$  retention capacity calculated from independent traces as shown in (E). The estimated mean  $\text{Ca}^{2+}$ /mg protein was for *Emre*<sup>*fl/fl*</sup>:  $105 \pm 21.21$  and *Emre*<sup>*CKO*</sup>:  $3.75 \pm 7.5$  nmol. Values represent mean  $\pm$  SD. \*\**p*<0.0001, *n* = 4 in each group. Student's *t*-test was used for statistical analysis. **G)** Quantitative analysis of swelling calculated via loss of absorbance (%) 15 minutes after  $\text{Ca}^{2+}$  addition. *MCM*<sup>+</sup>:  $25.25\% \pm 9.04$ , *Emre*<sup>*fl/fl*</sup>:  $28.91\% \pm 12.91$  and *Emre*<sup>*CKO*</sup>:  $8.74\% \pm 5.68$ . Values represent mean  $\pm$  SD. \*\**p*<0.0001, *n* = 4-6 in each group. One-way ANOVA test was used for statistical analysis.

# Supplementary Figure 5

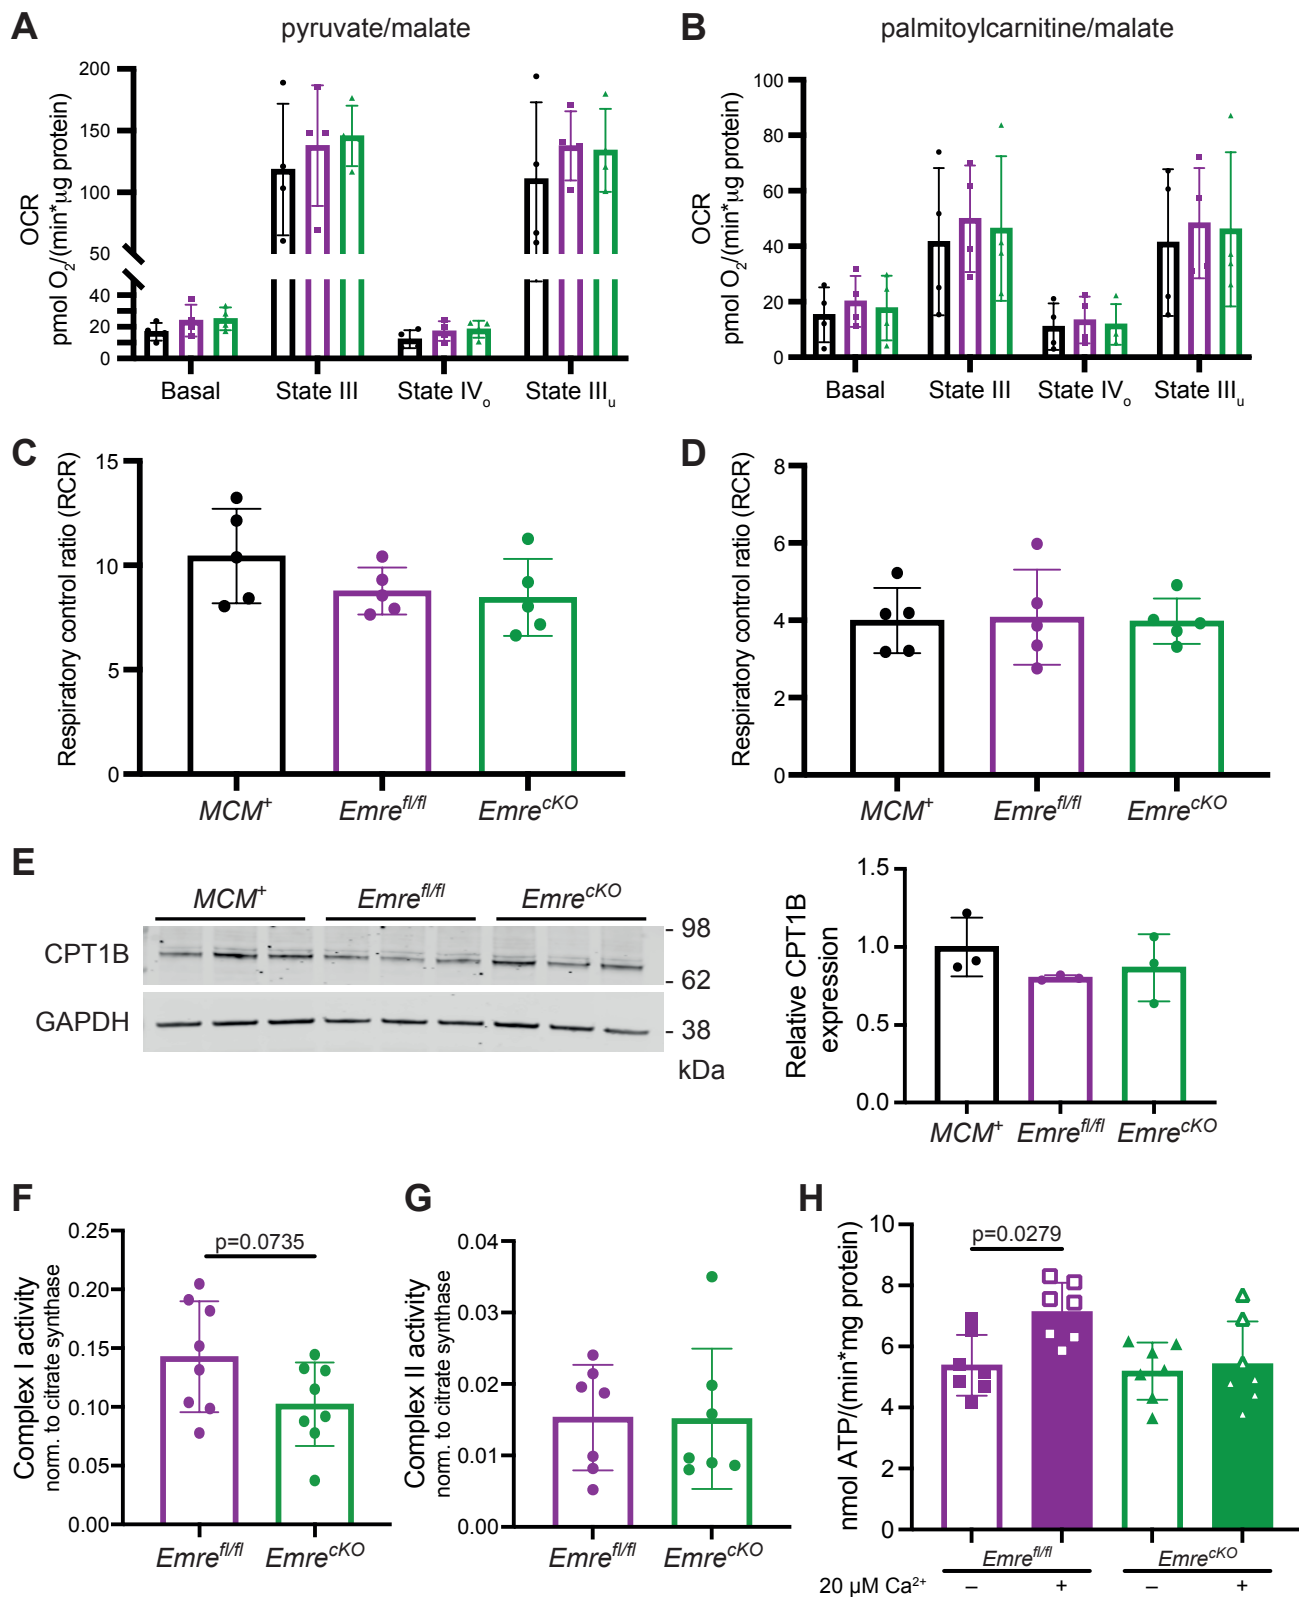

**Supplementary Figure 5.** *Effects of long-term Emre deletion on bioenergetic capacity.* Analyses were performed 3 months post-tamoxifen. **A-B)** Seahorse analysis of oxygen consumption rate (OCR) in cardiac mitochondria was measured by sequential injections: 4 mM ADP (state III), 2.5  $\mu$ g/mL oligomycin (state IV<sub>o</sub>), 6  $\mu$ M FCCP (state III<sub>u</sub>) and 4  $\mu$ M rotenone/4  $\mu$ M antimycin A. Mitochondria were supplied with 5 mM pyruvate/0.5 mM malate (A) or 40  $\mu$ M palmitoylcarnitine/0.5 mM malate (B). **C)** Respiratory control ratio (RCR; OCR in state III<sub>u</sub>/state IV<sub>o</sub>) in mitochondria supplied with 5 mM pyruvate/0.5 mM malate: *MCM*<sup>+</sup>:  $10.44 \pm 2.26$ , *Emre*<sup>fl/fl</sup>:  $8.76 \pm 1.12$  and *Emre*<sup>cKO</sup>:  $8.46 \pm 1.84$ . Values represent mean  $\pm$  SD, n = 5 per group (combined males and females). One-way ANOVA test was used for statistical analysis. **D)** RCR in mitochondria supplied with 40  $\mu$ M palmitoylcarnitine/0.5 mM malate, *MCM*<sup>+</sup>:  $3.99 \pm 0.85$ , *Emre*<sup>fl/fl</sup>:  $4.07 \pm 1.22$  and *Emre*<sup>cKO</sup>:  $3.97 \pm 0.58$ . Values represent mean  $\pm$  SD, n = 5 per group (combined males and females). One-way ANOVA test was used for statistical analysis. **E)** Western blot for CPT1B in cardiac tissue: *MCM*<sup>+</sup>:  $1.00 \pm 0.18$ , *Emre*<sup>fl/fl</sup>:  $0.80 \pm 0.01$  and *Emre*<sup>cKO</sup>:  $0.86 \pm 0.21$ , n = 3 per group. **F-G)** Complex I (NADH ubiquinone oxidoreductase) activity (n = 8 per group) (F) and Complex II (succinate dehydrogenase) activity (n = 6 per group) (G) normalized to citrate synthase (CS) activity. Values represent mean  $\pm$  SD, Student's t-test was used for statistical analysis. **H)** ATP production rate in isolated heart mitochondria stimulated with 50  $\mu$ M ADP and 10 mM glutamate/5 mM malate  $\pm$  20  $\mu$ M Ca<sup>2+</sup>, *Emre*<sup>fl/fl</sup>:  $5.38 \pm 0.99$  vs *Emre*<sup>fl/fl</sup> + 20  $\mu$ M Ca<sup>2+</sup>:  $7.13 \pm 0.94$ , and *Emre*<sup>cKO</sup>:  $5.19 \pm 0.93$  vs *Emre*<sup>cKO</sup> + 20  $\mu$ M Ca<sup>2+</sup>:  $5.43 \pm 1.38$  nmol ATP/(min\*mg) protein. Values represent mean  $\pm$  SD. \*p<0.05, n = 7 per group (combined males and females). One-way ANOVA was used for statistical analysis.

# Supplementary Figure 6

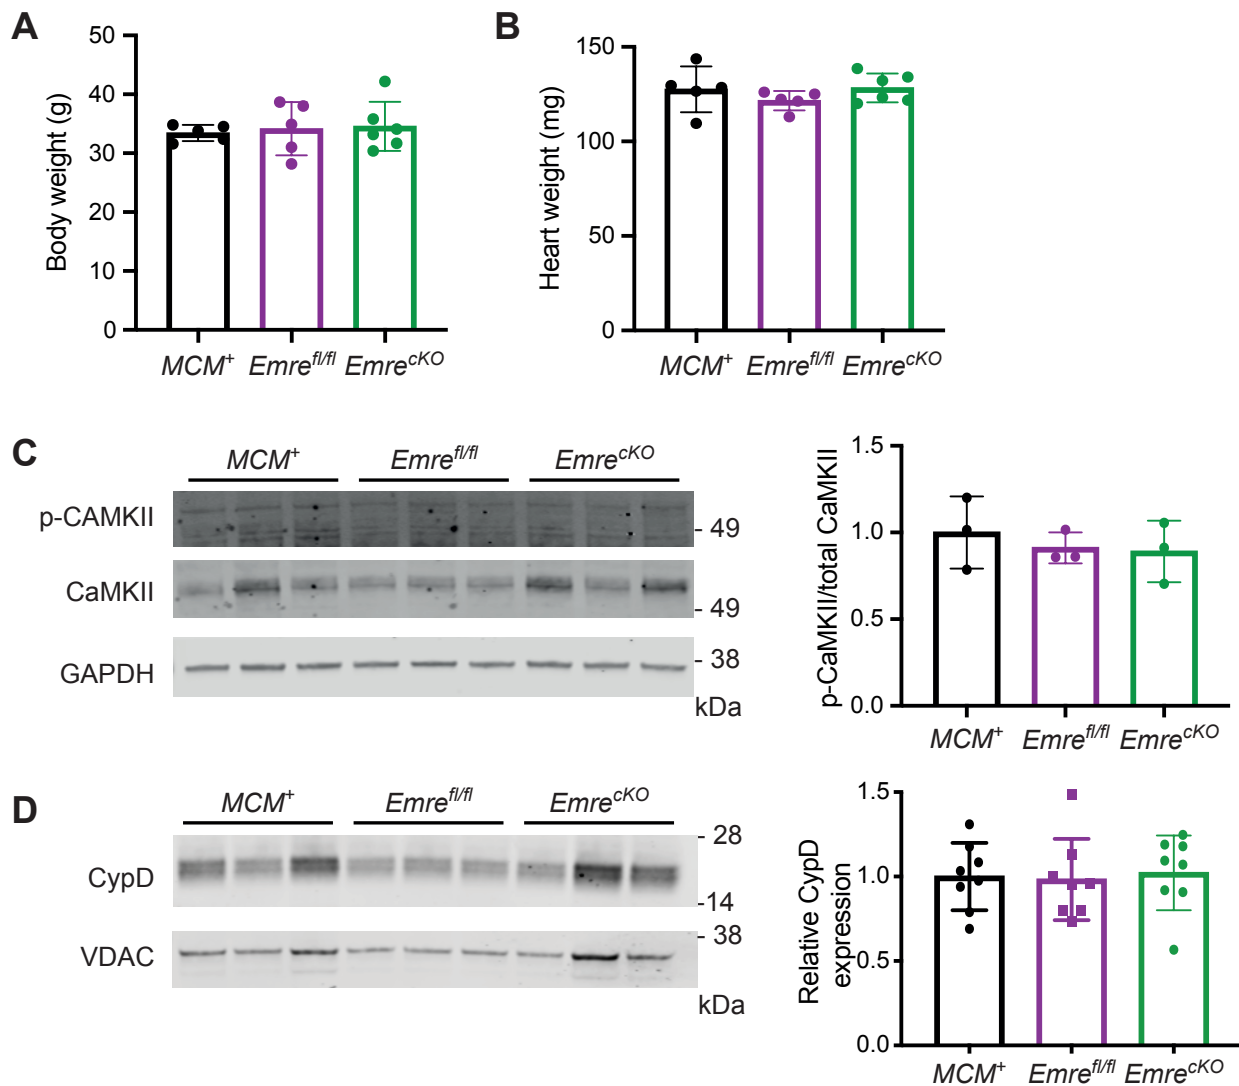

**Supplementary Figure 6.** *Effects of long-term Emre deletion on body and heart weight and protein expression.* Analyses were performed 3 months post-tamoxifen. **A-B)** Body weight (A) and heart weight (B) from  $MCM^+$ ,  $Emre^{fl/fl}$ , and  $Emre^{cKO}$  mice at 3 months post-tamoxifen. Values represent mean  $\pm$  SD, n = 5-6 per group. **C)** Western blot for phosphorylated CaMKII level relative to total CaMKII $\delta$  from cardiac tissue, quantified to the right in  $MCM^+$ :  $1.00 \pm 0.20$ ,  $Emre^{fl/fl}$ :  $0.91 \pm 0.08$  and  $Emre^{cKO}$ :  $0.89 \pm 0.17$ . Values represent mean  $\pm$  SD, n = 3 in each group. **D)** Western blot for Cyclophilin D (CypD) expression from cardiac mitochondria, quantified to the right in  $MCM^+$ :  $1.00 \pm 0.19$ ,  $Emre^{fl/fl}$ :  $0.98 \pm 0.24$  and  $Emre^{cKO}$ :  $1.02 \pm 0.22$ . Values represent mean  $\pm$  SD, n = 8 in each group. One-way ANOVA was used for statistical analysis in (A)-(D); p-values were not significant.

# Supplementary Figure 7

**A**

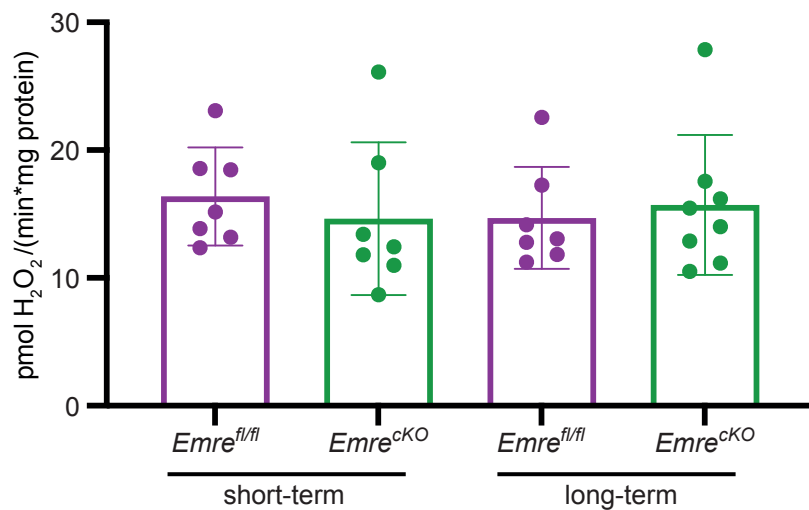

**B**

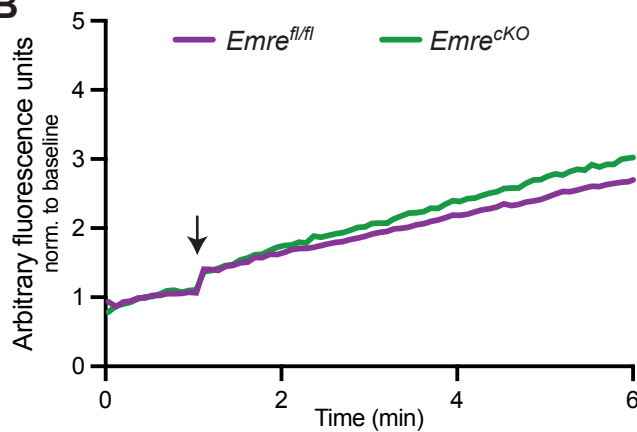

**C**

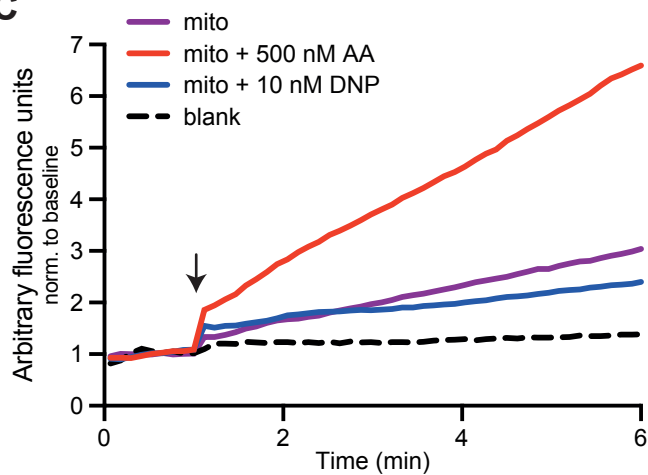

**Supplementary Figure 7.** *Short-term and long-term Emre deletion have little effect on mitochondrial H<sub>2</sub>O<sub>2</sub> production.* **A)** H<sub>2</sub>O<sub>2</sub> production rates measured by Amplex Red in short- and long-term *Emre*<sup>fl/fl</sup> and *Emre*<sup>cko</sup> cardiac mitochondria supplied 10 mM glutamate/5 mM malate. For short-term, *Emre*<sup>fl/fl</sup>: 16.38 ± 3.83, *Emre*<sup>cko</sup>: 14.64 ± 5.96, and for long-term, *Emre*<sup>fl/fl</sup>: 14.69 ± 3.98, *Emre*<sup>cko</sup>: 15.70 ± 5.47 pmol H<sub>2</sub>O<sub>2</sub>/(min\*mg protein). Values represent mean ± SD, n = 7-8 in each group. One-way ANOVA was used for statistical analysis. **B)** Representative traces obtained by measuring Amplex Red fluorescence in long-term *Emre*<sup>fl/fl</sup> (purple line) and *Emre*<sup>cko</sup> (green line) mitochondria. Arrow denotes the addition of 10 mM glutamate/5 mM malate. **C)** Representative traces confirming the sensitivity of Amplex Red to mitochondrial ROS production, using long-term *Emre*<sup>fl/fl</sup> mitochondria alone (purple line), with 500 nM antimycin A (AA, red line) as a positive control, or with 10 nM 2,4-dinitrophenol (DNP, blue line) as a negative control. A blank well without mitochondria is also shown (dashed black line).
